# Supplementary material for: Highly bendable bilayer-type photo-actuators comprising of reduced graphene oxide dispersed in hydrogels
Source: PubMed Central journal article supplement (PMC4750031; doi:10.1038/srep20921), 2016-02-11
Supplement: srep20921-s1.pdf [file srep20921-s1.pdf]

## Supplementary Information

# Highly bendable bilayer-type photo-actuators comprising of reduced graphene oxide dispersed in hydrogels

*Dowan Kim<sup>1</sup>, Heon Sang Lee<sup>2</sup>, Jinhwan Yoon<sup>1,\*</sup>*

<sup>1</sup>Department of Chemistry and <sup>2</sup>Department of Chemical Engineering

Dong-A University, 37 Nakdong-Daero 550beon-gil, Saha-gu, Busan 49315, Republic of  
Korea

Email: [jyoon@dau.ac.kr](mailto:jyoon@dau.ac.kr)

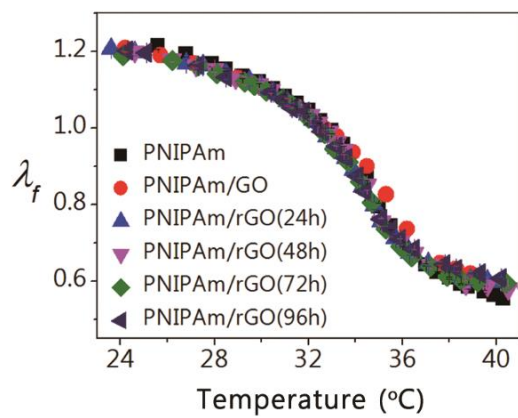

**Figure S1.** Temperature-dependent linear swelling ratio,  $\lambda_f$ , of PNIPAm/GO and PNIPAm/rGO(*N*).

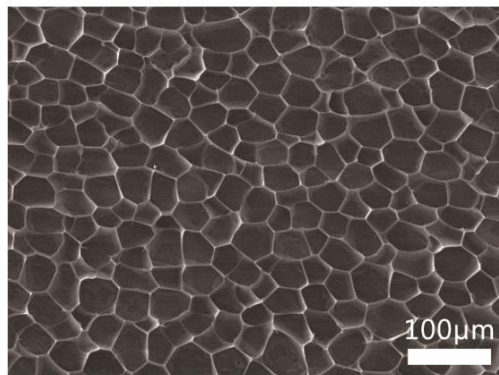

PNIPAm/GO

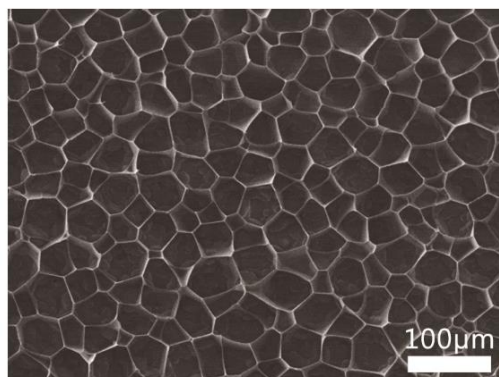

PNIPAm/rGO(96h)

**Figure S2.** Scanning electron microscopy images of PNIPAm/GO and PNIPAm/rGO(96h). SEM images were obtained using freeze dried samples at 5.0 kV and a working distance of 8.0 mm (JSM-6700F, JEOL, Japan).

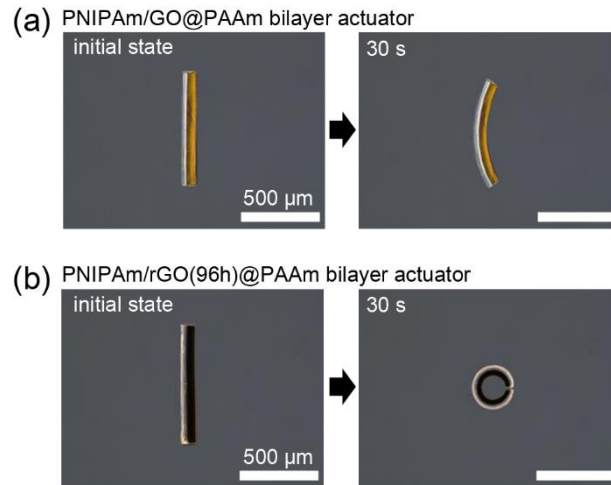

**Figure S3.** Light-induced actuation motion of (a)PNIPAm/GO@PAAm bilayer actuator and (b)PNIPAm/rGO(96h)@PAAm bilayer actuator.
